# Supplementary material
Source: PubMed Central journal article supplement (PMC4254594)

**FIGURE S1:**

Brain areas where local cortical thickness is associated with the “Age × Years of Playing” interaction (N = 232; 334 time points). Note: The figure is shown at  $p \leq 0.05$  with a false discovery rate correction. Controlled for age, gender, and scanner.

**FIGURE S2:**

Brain areas where local cortical thickness is associated with the “Child Behavior Checklist Attention Problems by Age” interaction in the cross-sectional analysis (n = 257). Note: The figure is shown at  $p \leq 0.05$  with a false discovery rate correction. Controlled for age, gender, total brain volume, and scanner.

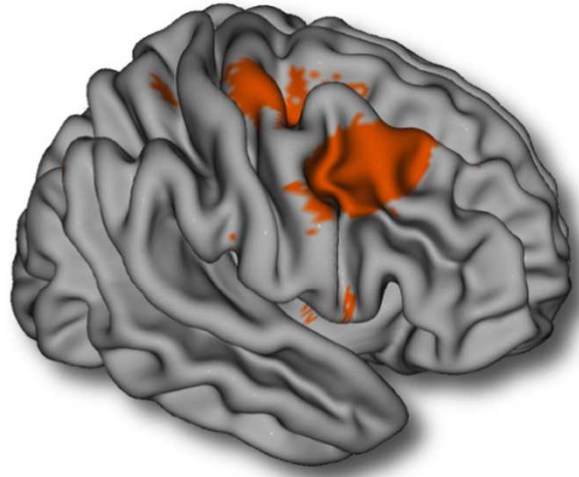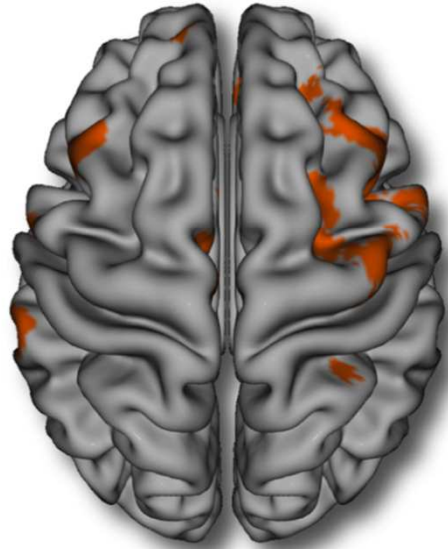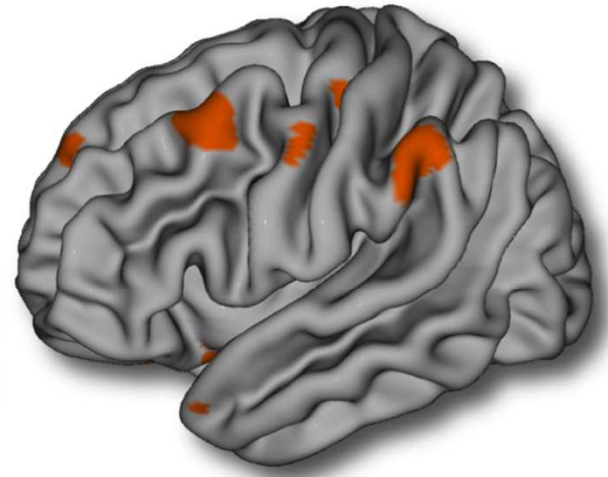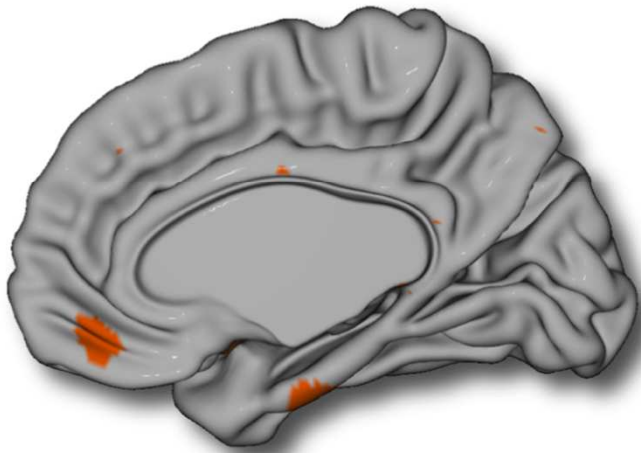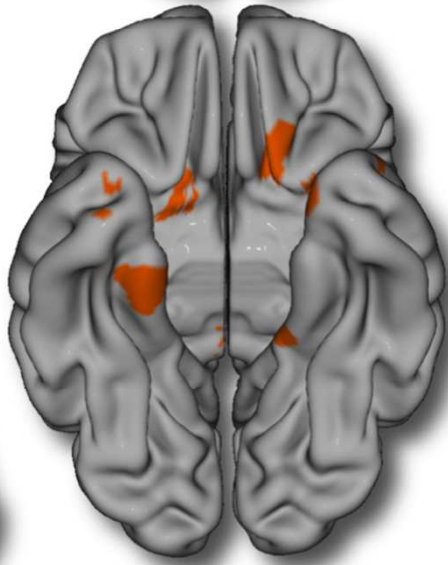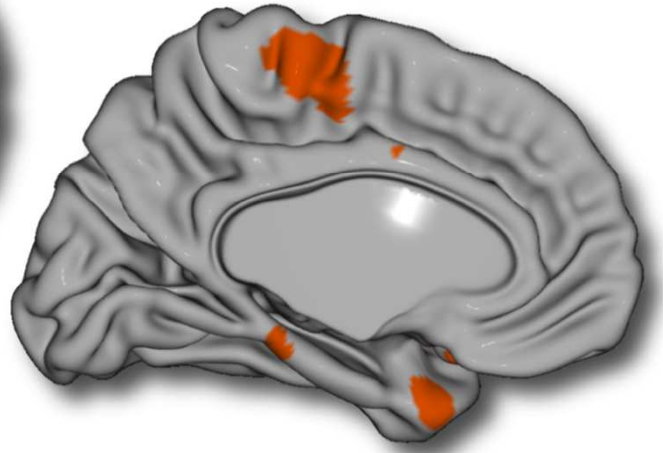

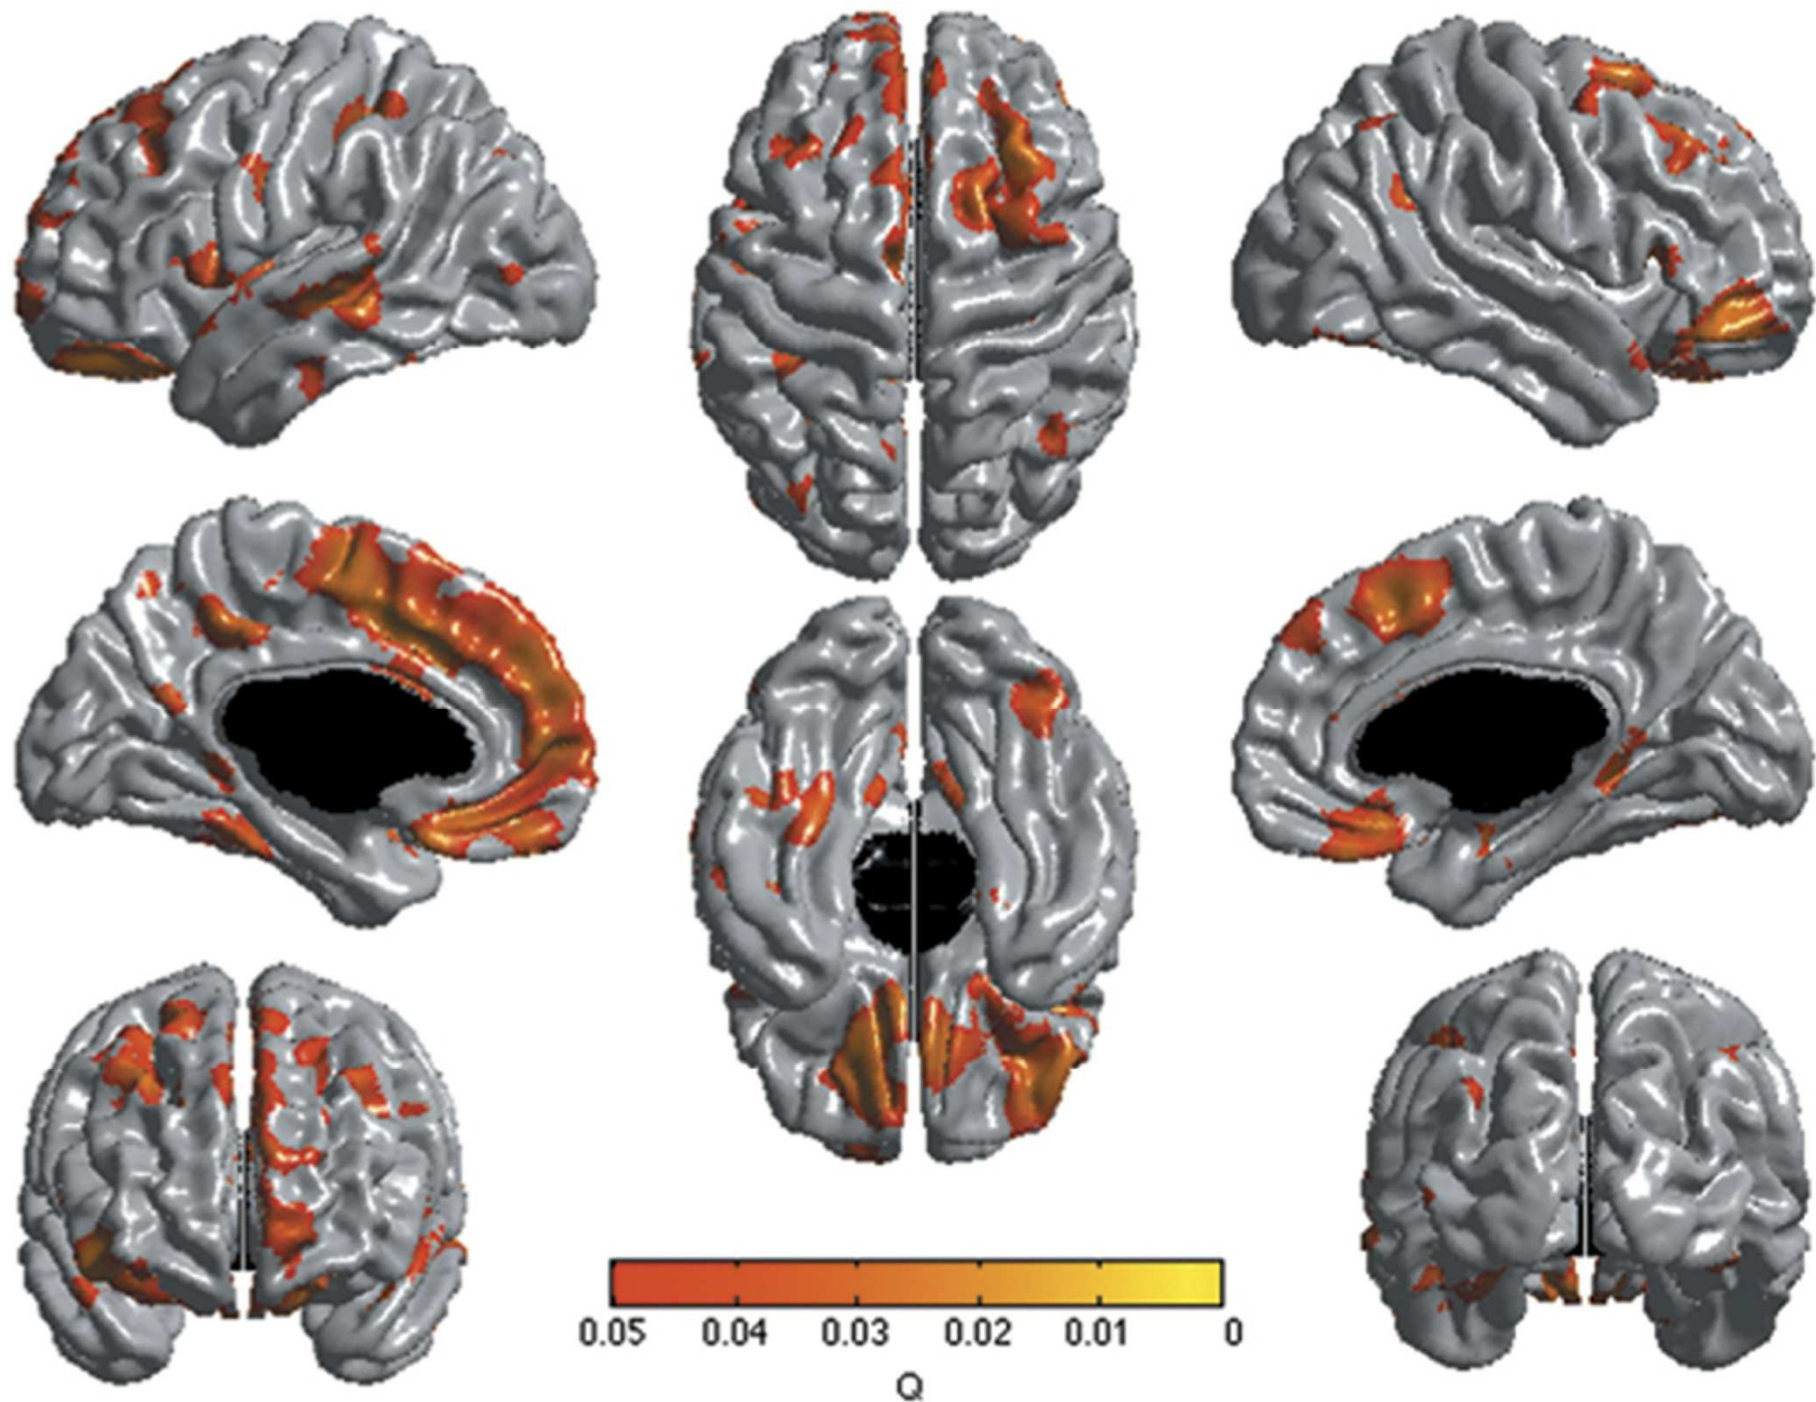

Supplement: NIHMS632213-supplement-01.pdf [file NIHMS632213-supplement-01.pdf]
